# Supplementary material
Source: publisher figshare collection journal article supplement (https://acs.figshare.com/ndownloader/files/4469524)
Supplement: Supplementary file 1 [file 4469524]

# Enzyme-Based Multiplexer and Demultiplexer

Mary A. Arugula, Vera Bocharova, Jan Halánek, Marcos Pita and Evgeny Katz\*

*Department of Chemistry and Biomolecular Science, and NanoBio Laboratory*

*(NABLAB), Clarkson University, Potsdam NY 13699-5810, USA*

## **Supporting Information**

**Experiments on Multiplexer:** For these experiments 1mL plastic cuvette was used. The experiments were performed at 37 °C in 50 mM phosphate buffer. For all logic combinations solutions were mixed by gently pumping the pipette during 10 sec before recording. The **Output** signal was read at wavelength of 420 nm. The time for the **Output** signal was fixed at 20 min from the beginning of the recording. For this particular time, the difference between **0** and **1** output signals, achieved by the tuning the speed of the enzymatic reactions, reaches the highest values.

**Experiments on Demultiplexer:** The experiments were carried out in 2 mL quartz cuvette. For all logic combinations solutions were mixed by gently pumping the pipette during 10 sec before recording. The **Output** signals were read at wavelength of 420 nm and 340 nm. The values for the **Output** signals were picked up at 10 min from the beginning of the recording. This time gives the best performance for the enzymatic demultiplexer.

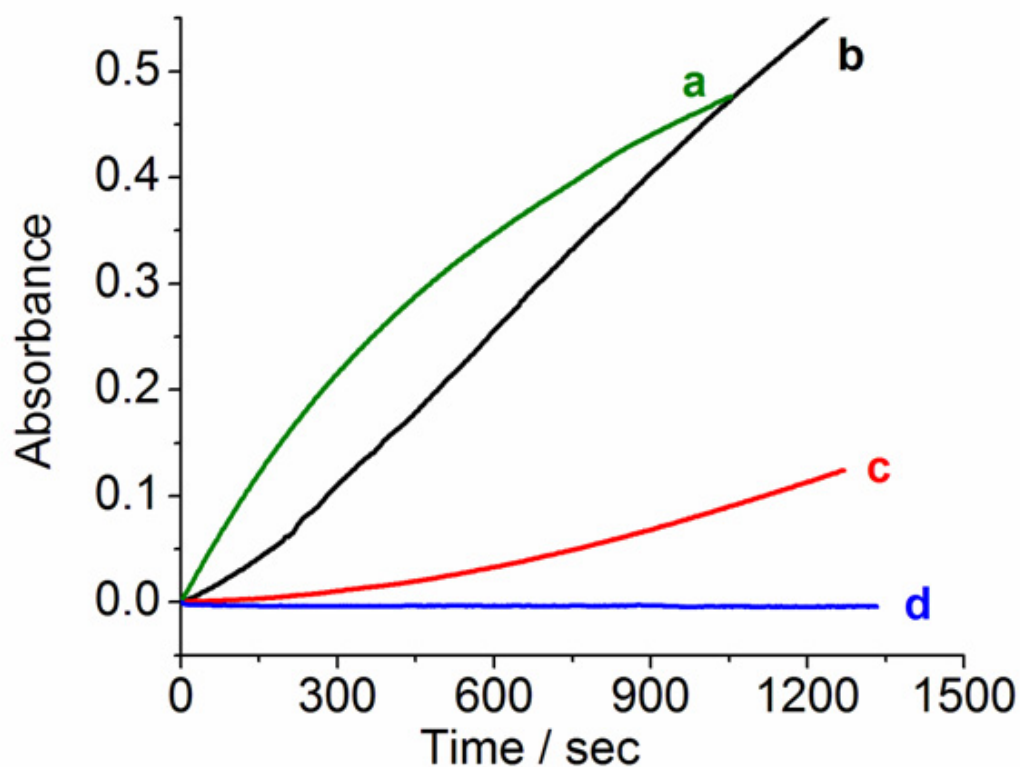

**Figure S11.** Time-dependent absorbance changes at  $\lambda = 420$  nm upon biocatalytic oxidation of 10 mM ferrocyanide in the presence of: a) 0.5 milliunits $\cdot$ mL $^{-1}$  Lac and O<sub>2</sub> (under equilibrium with air) at pH 2.0; b) 0.1 units $\cdot$ mL $^{-1}$  GOx, 10 units $\cdot$ mL $^{-1}$  HRP, 10 mM glucose at pH 8.6; c) 0.1 units $\cdot$ mL $^{-1}$  GOx, 10 units $\cdot$ mL $^{-1}$  HRP, 10 mM glucose at pH 2.0; d) ) 0.5 milliunits $\cdot$ mL $^{-1}$  Lac and O<sub>2</sub> (under equilibrium with air) at pH 8.6. The reactions were performed in 50 mM phosphate buffer solution titrated to the desired pH value.
